# Supplementary material
Source: publisher site journal article supplement (https://www.dovepress.com/article/210958)

## Supplementary content:

Table 1s. Univariate analysis of parameters:

|                                    |                                                | HR (95% CI)        | p-value |
|------------------------------------|------------------------------------------------|--------------------|---------|
| Sex                                |                                                | 0.95 (0.46 – 1.96) | 0.90    |
| Age                                |                                                | 1.03 (0.99 – 1.07) | 0.17    |
| PS                                 |                                                | 1.72 (1.14 – 2.59) | 0.009   |
| Histology                          | Adenocarcinoma                                 |                    | 0.85    |
|                                    | Squamous Cell Carcinoma                        | 0.80 (0.36 – 1.77) | 0.58    |
|                                    | NSCLC                                          | 0.85 (0.29 – 2.50) | 0.76    |
| Smoking Status                     | Never                                          |                    | 0.96    |
|                                    | Stopped over 10 years ago                      | 1.42 (0.30 – 6.72) | 0.66    |
|                                    | Stopped between 1-10 years ago                 | 1.15 (0.23 – 5.95) | 0.87    |
|                                    | Current smoker or stopped less than 1 year ago | 1.20 (0.27 – 5.23) | 0.81    |
| Number of previous treatment Lines |                                                | 0.73 (0.35 – 1.35) | 0.32    |
| Albumin                            |                                                | 0.26 (0.12 – 0.55) | <0.001  |
| BMI                                |                                                | 1.01 (0.94 – 1.09) | 0.70    |
| SMI                                |                                                | 0.99 (0.95 – 1.02) | 0.59    |
| FFMI                               |                                                | 0.97 (0.85 – 1.10) | 0.64    |
| FMI                                |                                                | 1.00 (0.87 – 1.15) | 0.99    |
| Weight Change                      |                                                | 1.67 (1.12 – 2.59) | 0.012   |

CI: confidence interval. NSCLC: non-small cell lung cancer. BMI: body mass index. SMI: skeletal mass index. FFMI: fat free mass index. FMI: fat mass index.

Table 2s. Multivariate analysis of parameters (weight change, Albumin and performance status as categorical variables)

| Multivariable cox regression       |                                                |                       |         |
|------------------------------------|------------------------------------------------|-----------------------|---------|
| Parameters                         |                                                | HR (95% CI)           | p-value |
| Sex                                |                                                | 1.26 (0.32 – 4.89)    | 0.742   |
| Age                                |                                                | 0.99 (0.92 – 1.05)    | 0.682   |
| PS                                 |                                                | 2.19 (0.63 – 7.57)    | 0.214   |
| Histology                          | Adenocarcinoma                                 |                       | 0.056   |
|                                    | Squamous Cell Carcinoma                        | 0.20 (0.04 – 0.90)    | 0.036   |
|                                    | NSCLC                                          | 0.36 (0.08 – 1.62)    | 0.186   |
| Smoking Status                     | Never                                          |                       | 0.359   |
|                                    | Stopped over 10 years ago                      | 1.58 (0.18 – 14.20)   | 0.683   |
|                                    | Stopped between 1-10 years ago                 | 0.51 (0.05 – 4.93)    | 0.566   |
|                                    | Current smoker or stopped less than 1 year ago | 1.71 (0.21 – 13.91)   | 0.615   |
| Number of previous treatment Lines |                                                | 0.34 (0.14 – 0.83)    | 0.018   |
| Albumin                            |                                                | 2.08 (0.76 – 5.66)    | 0.151   |
| BMI                                |                                                | 1.16 (0.95 – 1.42)    | 0.143   |
| SMI                                |                                                | 0.44 (0.16 – 1.18)    | 0.103   |
| FFMI                               |                                                | 14.83 (0.54 – 405.35) | 0.110   |
| FMI                                |                                                | 0.95 (0.67 – 1.34)    | 0.773   |
| Weight Change                      |                                                | 8.58 (2.33 – 31.57)   | 0.001   |

HR: hazard ratio. CI: confidence interval. PS: performance status. \*PS as categorical: 0 and 1 versus 2 and 3. Albumin as categorical:  $\geq$ LLN versus Albumin  $<$ LLN. Weight change as categorical: Weight loss  $<$ 5% versus Weight loss  $\geq$ 5%.

Figure 1s. Overall survival curves, by Performance Status (PS)

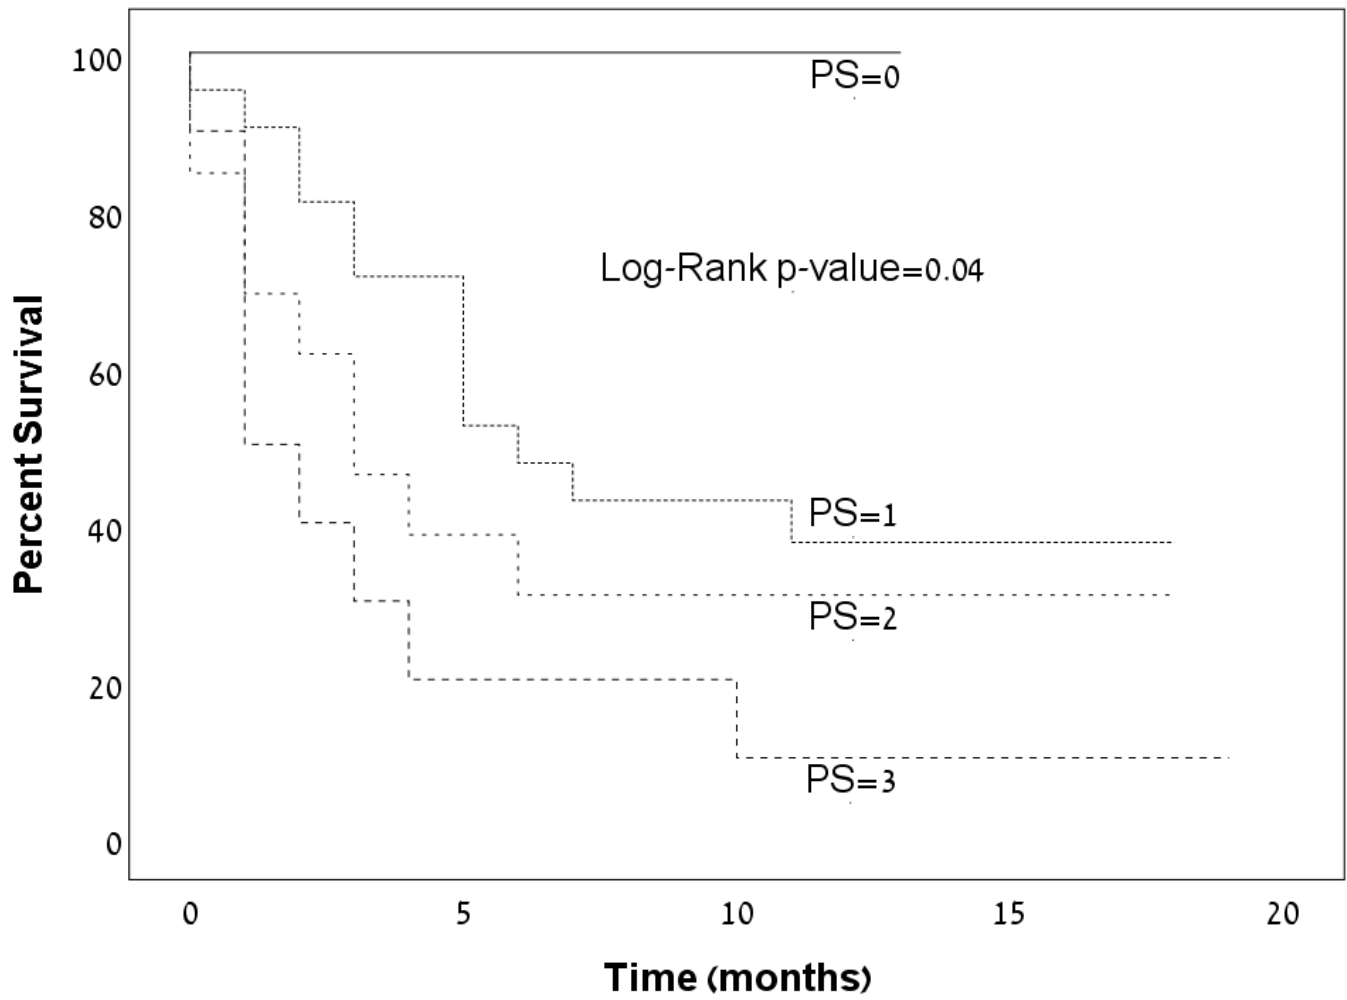

Supplement: Supplementary file 1 [file get_supplementary_file.php]
